# Supplementary material for: Comparative scaffolding and gap filling of ancient bacterial genomes applied to two ancient Yersinia pestis genomes
Source: PubMed Central journal article supplement (PMC5643016; doi:10.1099/mgen.0.000123), 2017-07-08
Supplement: mgen-3-123-s001.pdf [file mgen-3-123-s001.pdf]

545 **A Supplementary Material**

546 **A.1 Reference genomes**

**Table S1.** Accession numbers of full assemblies for the chromosome of all extant *Yersinia pestis* and *Yersinia pseudotuberculosis* reference genomes. In addition, the number of IS annotations per reference is given.

| Strain                     | Accession no. | IS annotations |
|----------------------------|---------------|----------------|
| <i>Yersinia pestis</i>     |               |                |
| CO92                       | NC_003143.1   | 233            |
| Antiqua                    | NC_008150.1   | 293            |
| Z176003                    | NC_014029.1   | 170            |
| Nepal516                   | NC_008149.1   | 212            |
| KIM10+                     | NC_004088.1   | 151            |
| biovar Microtus 91001      | NC_005810.1   | 168            |
| Pestoides F                | NC_009381.1   | 190            |
| <i>Yersinia pseudotub.</i> |               |                |
| IP 31758                   | NC_009708.1   | -              |
| YPIII                      | NC_010465.1   | -              |
| PB1/+                      | NC_010634.1   | -              |
| IP32953                    | NC_006155.1   | -              |

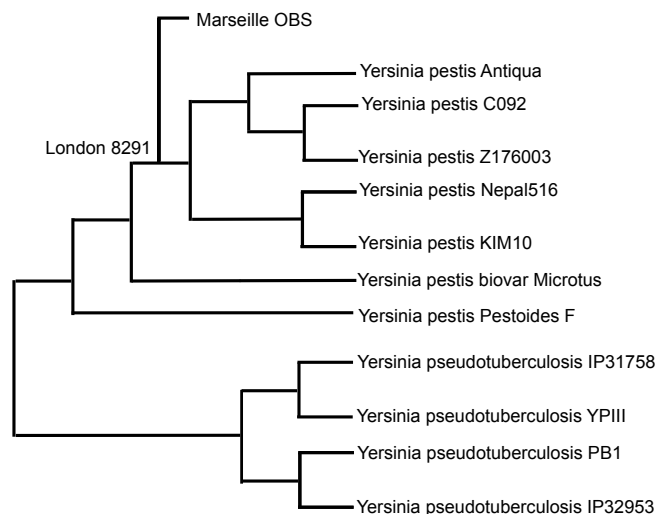

**Figure S1.** *Yersinia pestis* phylogeny, including seven extant *Yersinia pestis* strains, four extant *Yersinia pseudotuberculosis* strains and two ancient *Yersinia pestis* strains from the London and Marseille outbreak of the bubonic plague.

**Table S2.** IS families obtained from BASys annotations.

| IS family | Number of sequences |
|-----------|---------------------|
| IS1328    | 6                   |
| IS150     | 71                  |
| IS200     | 568                 |
| IS21      | 8                   |
| IS257     | 13                  |
| IS3A      | 12                  |
| IS4       | 2                   |
| IS5376    | 343                 |
| IS911     | 15                  |
| IS911B    | 15                  |
| ISRM3     | 243                 |

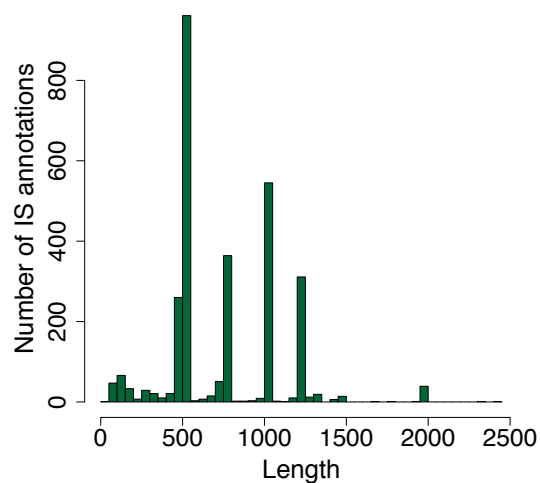

**Figure S2.** Lengths of all potential IS annotations in all reference genomes.

547 **A.2 Ancient read data**

548 The read set for the London strain individual 8291 (Genbank accession SRA045745) consists of merged single-end  
 549 reads obtained by array-based enrichment and Illumina sequencing<sup>3</sup>. The read set for the Marseille strain (European  
 550 Nucleotide Archive under accession PRJEB12163) consists of five samples obtained by array-based enrichment and  
 551 Illumina sequencing as well<sup>2</sup>. For this data set, we merged the paired-end reads according to the preprocessing described  
 552 in the next section.

553

**Table S3.** Read classification with kraken<sup>13</sup> against a local copy of NCBI Nucleotide Database to obtain a taxonomic classification for reads in both datasets. The table contains an extract of the report computed by kraken, with the two most frequent genera in addition to the *Yersinia* classification.

| London                       |         |            | Marseille                    |           |            |
|------------------------------|---------|------------|------------------------------|-----------|------------|
| Taxon                        | # reads | % of reads | Taxon                        | # reads   | % of reads |
| unclassified                 | 2672978 | 27.21      | unclassified                 | 9,825,271 | 58.31      |
| Bacteria                     | 7138248 | 72.67      | Bacteria                     | 6,856,243 | 40.69      |
| <i>Yersinia</i>              | 3772442 | 38.40      | <i>Yersinia</i>              | 4,550,983 | 27.01      |
| <i>Y. pestis</i>             | 375138  | 3.82       | <i>Y. pestis</i>             | 726615    | 4.31       |
| <i>Y. pseudotuberculosis</i> | 3127    | 0.03       | <i>Y. pseudotuberculosis</i> | 7462      | 0.04       |
| <i>Y. enterocolitica</i>     | 1574    | 0.02       | <i>Y. enterocolitica</i>     | 2337      | 0.01       |
| <i>Rhodanobacter</i>         | 9302    | 0.09       | <i>Mycoplasma</i>            | 21049     | 0.12       |
| <i>Pusillimonas</i>          | 8207    | 0.08       | <i>Burkholderia</i>          | 12697     | 0.08       |

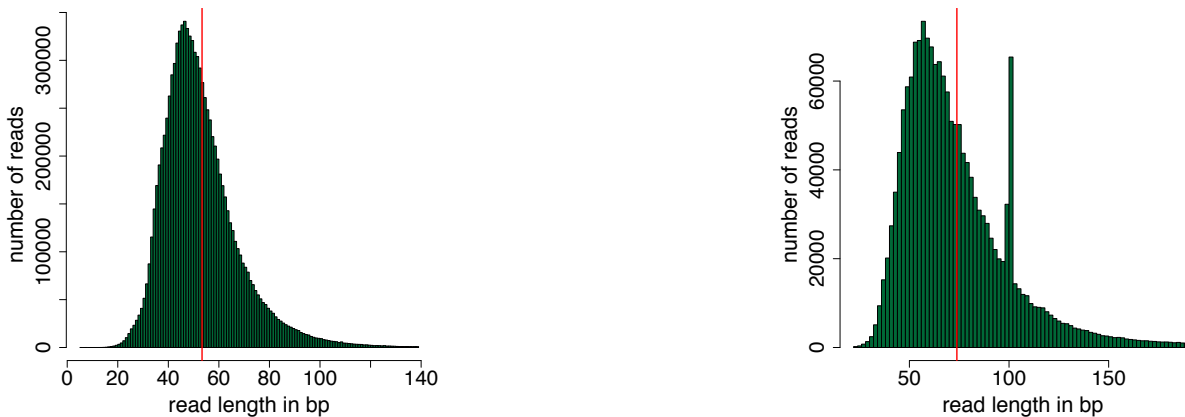

**Figure S3.** Read length distribution for reads in datasets 8291 (London) and OBS116 (Marseille).

### 554 A.3 Preprocessing of reads

555 The raw reads of all OBS samples have been preprocessed and merged (as described in<sup>2</sup>):

```

556 1) Trim adapters separately for R1 and R1, adapter sequence given
557 # -a adapter sequence
558 # -e maximum allowed error rate (no. of errors divided by the length
559 # of the matching region)
560 # -O minimum overlap length between read and adapter
561 cutadapt -a AGATCGGAAGAGC -e 0.16 -O 1 $READS_R1 -o "${SAMPLE}_R1t.fastq"
562 cutadapt -a AGATCGGAAGAGC -e 0.16 -O 1 $READS_R2 -o "${SAMPLE}_R2t.fastq"
563 3) Merge trimmed reads
564 # -m minimum required overlap length between two reads to provide a
565 # confident overlap
566 # -x maximum allowed ratio between the number of mismatched base pairs
567 # and the overlap length
568 flash "${SAMPLE}_R1t.fastq" "${SAMPLE}_R2t.fastq" -m 11 -x 0.15
569 -o "${SAMPLE}_R12t.fastq"
570 4) Concatenate merged reads and unmerged R1s and filter out reads
571 shorter than 24 bases
572 ./min_length.py "${SAMPLE}_R121.fastq" "${SAMPLE}_R121_24.fastq"

```

### 573 A.4 Contig assembly

574 For both datasets, we assembled aDNA reads with minia<sup>4</sup> with different values of the k-mer threshold  $k \in \{17, 19, 21\}$   
575 and a minimal k-mer occurrence of 3. We evaluated the total contigs length with regards to a minimal contig length  
576 threshold  $\in \{200, 300, 400, 500\}$ . The total contig length can indicate how much of the expected genome size the  
577 assembled contigs can cover, while a higher minimal contig threshold can provide a better base for defining markers.  
578 We found the best trade-off with  $k = 19$  and a minimal contig length of 300bp for the 8291 dataset and  $k = 21$  and a  
579 minimal contig length of 300bp for the OBS116 dataset. In addition, Bos et al<sup>3</sup> describe a reference-based assembly of  
580 the London strain consisting of 2,134 contigs of length at least 500bp. It was obtained with the assembler Velvet<sup>14</sup>  
581 using the extant strain *Yersinia pestis CO92* as a reference. In order to assess the influence of the reference sequence  
582 in the assembly of the ancient genome, we compare our pipeline using this initial assembly to our results based on  
583 the de novo assembly. We will refer to the assembly by Bos et al. as *reference-based* in the following. As expected,  
584 the de novo assembly is more fragmented with 4,183 contigs of length at least 300bp that cover 2,631,422 bp. We  
585 compared both contig assemblies by aligning them with MUMmer<sup>7</sup>. Unaligned bases mostly belong to regions in the  
586 reference-based assembly that have not been assembled in the conservative de novo assembly, and only an extremely  
587 low amount of nucleotide variations can be observed (Table S4), and no observed genome rearrangement.

**Table S4.** Comparison of contigs in reference-based and de novo assembly of the London data set.

|                          | reference-based assembly<br>Velvet <sup>3,14</sup> | de novo assembly<br>minia <sup>4</sup> |
|--------------------------|----------------------------------------------------|----------------------------------------|
| Length threshold $L$     | 500 bp                                             | 300 bp                                 |
| Number of contigs $> L$  | 2134                                               | 4183                                   |
| Total contig length      | 4,013,159 bp                                       | 2,631,422 bp                           |
| Aligned contigs          | 1,866 (87.44%)                                     | 3,885 (92.88%)                         |
| Aligned bases            | 2,414,881(60.17%)                                  | 2,380,757(90.47%)                      |
| Unaligned bases          | 1,598,278 (39.83%)                                 | 250,665 (9.53%)                        |
| Single Nucleotide InDels |                                                    | 14                                     |
| SNPs                     |                                                    | 39                                     |

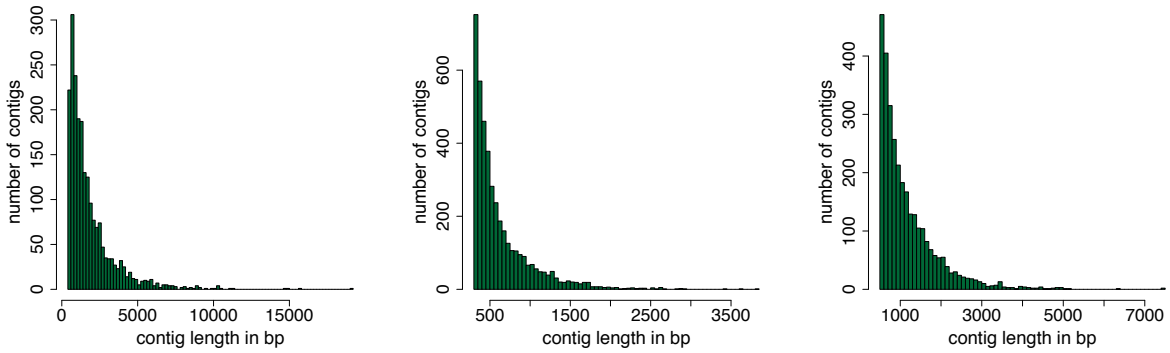

**Figure S4.** Contig length distribution for (1) all contigs longer than 500bp in the reference-based assembly for the London dataset and (2) all contigs longer than 300bp in the de novo assembly for the London dataset and (3) all contigs longer than 500bp in the de novo assembly for Marseille dataset OBS116.

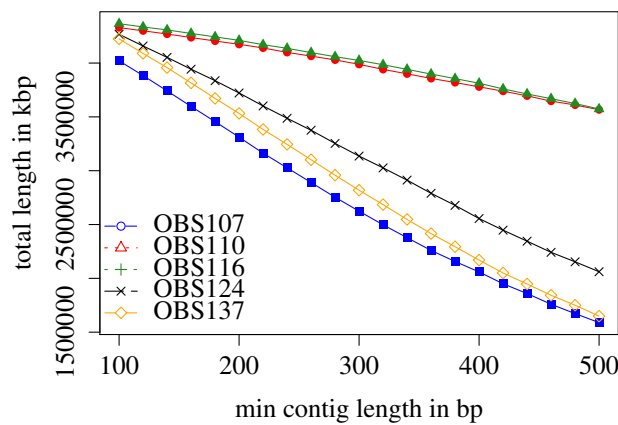

**Figure S5.** Total length of contigs mapped to *Yersinia pestis* CO92 greater than a minimum contig length for Marseille samples.

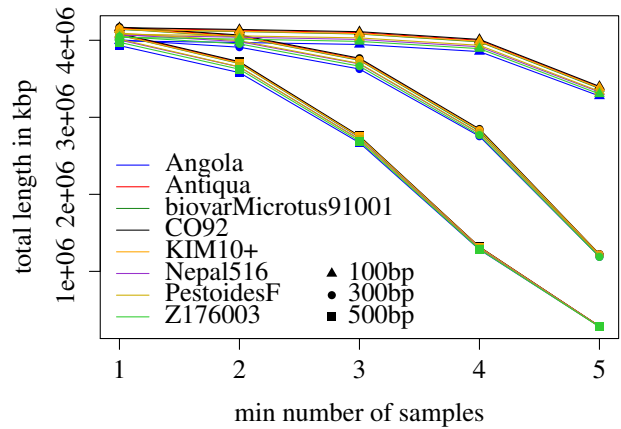

**Figure S6.** Comparison of contigs by mapping to different reference sequences. While most of the references are covered by at least one sample, only a small part of the references is covered by all Marseille samples.

## 588 A.5 Ancestral marker adjacencies

589 We define ancestral markers as described in<sup>10</sup>. Potential ancestral adjacencies are defined according to the Dollo  
 590 parsimony criteria. We obtain 2,207 markers that cover 3,463,281 bp in total for the reference-based assembly. For the  
 591 de novo assembly, we obtain 3,691 markers covering 2,215,596 bp in total. All markers for the de novo assembly are  
 592 contained in or overlapping with markers from the reference-based assembly.

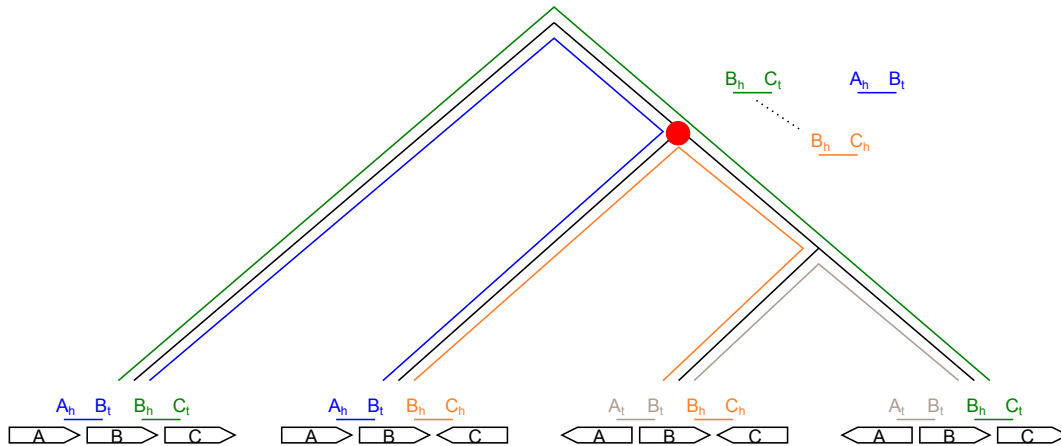

**Figure S7.** Defining the set of potential ancestral adjacencies, given extant adjacencies at the leaves of the phylogeny. An adjacency is potentially ancestral if it is present in two extant leaves whose path in the tree contains the ancestor of interest (red dot). In this example, the blue, green and orange adjacencies fulfill this criterion, while the grey adjacency is not potentially ancestral. Note that the set of potential ancestral adjacencies is not consistent: The green and orange adjacencies are conflicting as they share the same marker extremity  $B_h$  (see also Figure S8.)

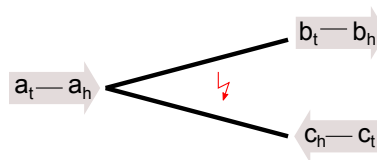

**Figure S8.** Example for conflicting adjacencies. Each marker  $a, b$  and  $c$  is depicted by its extremities in order to decode its orientation in the genome. The two adjacencies  $\{a_h, b_t\}$  and  $\{a_h, c_h\}$  are conflicting and cannot be part of a consistent reconstructed genome in the same time. See also S14 and S17 for conflicting adjacencies in both ancient *Yersinia pestis* datasets.

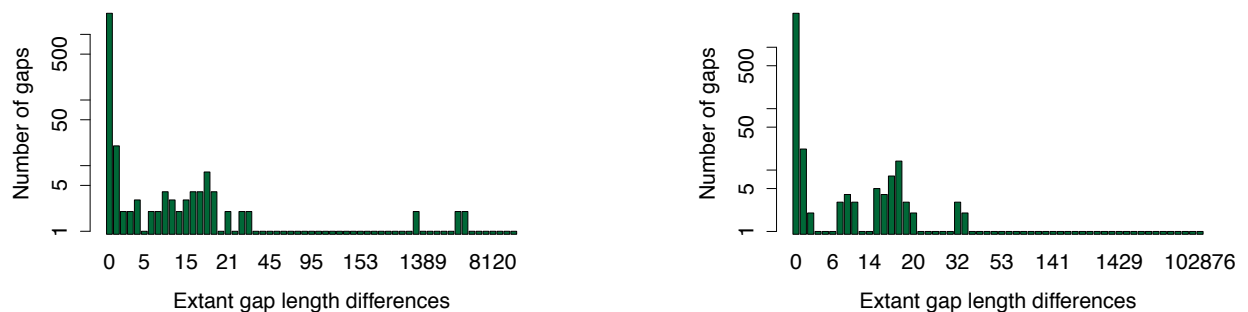

**Figure S9.** Length variation of extant gaps supporting potential ancestral adjacencies for the 8291 dataset: (a) for markers based on the reference-based assembly, (b) for markers based on the de novo assembly.

593 **A.6 Read mapping**

594 For mapping the reads to the template gap sequences, we used *BWA*<sup>8</sup> with parameter -a to keep all alignments for each  
 595 read and samtools rmdup to remove PCR-duplicates. In order to correctly identify breakpoints in the mappings, we also  
 596 removed all clipped alignments.

```
597 bwa mem -a ${GAP} ${READS}.fastq > ${GAP}.sam
598 awk ' $6 !~ /H|S/{print}' ${GAP}.sam | samtools view -S -F 4 -b > ${GAP}.bam
599 samtools sort ${GAP}.bam ${GAP}_mapped
600 samtools rmdup -s ${GAP}_mapped.bam ${GAP}_mapped_d.bam
```

601 **A.7 Filling of gaps between adjacent markers**

602 For the reference-based assembly, we inferred 2,208 potential adjacencies: 1,991 are simple, 207 IS-annotated but  
 603 non-conflicting, and 10 are conflicting. Among the conflicting adjacencies 8 are also IS-annotated, illustrating that most  
 604 rearrangements in *Yersinia pestis* that can create ambiguous signal for comparative scaffolding, are associated with IS  
 605 elements. We have 28 and 21 gaps in the reference-based and de novo assembly respectively whose lengths difference  
 606 falls into the length range of potential annotated IS elements, thus raising the question of the presence of an IS within  
 607 these adjacencies in the ancestral genome. We note a small number of potential ancestral adjacencies with strikingly  
 608 large extant gap length differences (7 and 5 in the respective assemblies).

609 For each filled gap, we computed the edit distance between the read-based gap sequence and the respective template  
 610 for both assemblies (see Figure S11). Especially for IS-annotated gaps, this allows us to compare the filled gap sequence  
 611 with the reconstructed gap sequence if IS annotations are ignored. One gap annotated with an IS elements in the  
 612 reference-based assembly shows a larger distance of 1959 to the template, corresponding to the annotated length of  
 613 the IS. While the template does not include the IS sequence, the mappings of the reads shows clear breakpoints at the  
 respective gap for the non-IS template and provides full coverage for the IS template.

**Table S5.** Results of gap filling for both assemblies of the London dataset. If a gap is conflicting and IS-annotated, we assign it to the conflicting group.

|                        | reference-based assembly |             |         | de novo assembly    |             |         |
|------------------------|--------------------------|-------------|---------|---------------------|-------------|---------|
|                        | consistent               | conflicting | IS      | consistent          | conflicting | IS      |
| gaps of length 0       |                          | 48          |         |                     | 29          |         |
| gaps filled            | 1,162                    | 2           | 109     | 2808                | 2           | 92      |
| length (bp)            | 172,614                  | 7,876       | 70,550  | 710,138             |             | 86,805  |
| gaps partially filled  | 718                      | -           | 84      | 637                 | -           | 98      |
| total length (bp)      | 319,633                  | -           | 240,085 | 862,307             | -           | 505,856 |
| coverage by reads (bp) | 245,779                  | -           | 194,414 | 765,406             | -           | 443,090 |
| gaps not filled        | 63                       | 8           | 14      | 9                   | 5           | 11      |
| length (bp)            | 7,154                    |             | 172,689 | 25,777              |             | 18,249  |
| total number of gaps   | 1,943                    | 10          | 207     | 3454                | 7           | 201     |
| total gap length (bp)  | 499,401                  |             | 483,324 | 1,598,222           |             | 610,910 |
| total assembly length  | 4,398,214                |             |         | 4,441,004           |             |         |
| coverage by marker     | 3,463,281 (78.74 %)      |             |         | 2,215,596 (49.88 %) |             |         |
| coverage by reads      | 4,154,514 (94.46 %)      |             |         | 4,230,162 (95.25 %) |             |         |

614

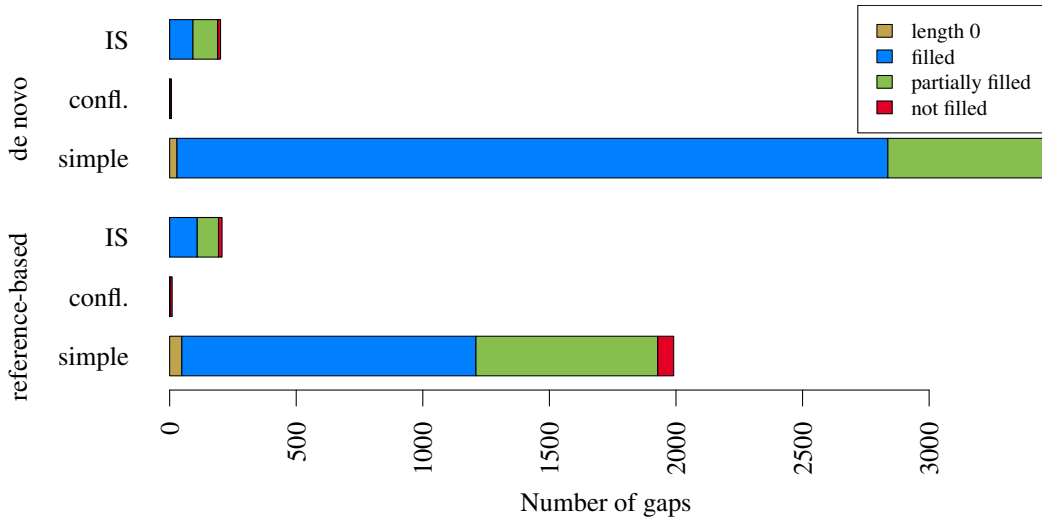

**Figure S10.** Result of gap filling for the reference-based as well as the de novo assembly for the London data set. Note that if a gap is conflicting and IS-annotated, we assign it to the conflicting group. We differentiate between gaps of length 0 (i. e. both markers are directly adjacent), completely and partially filled gaps and not filled gaps.

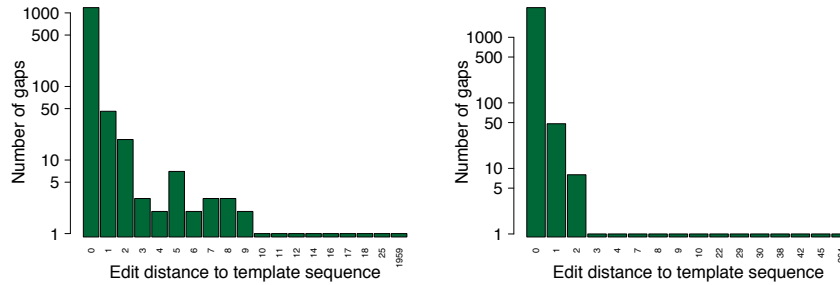

**Figure S11.** (a) Edit distance between reconstructed gap sequence and template sequence for all covered gaps in the reconstruction for (a) the reference-based assembly, (b) the de novo assembly.

**Table S6.** Gaps filled in the marseille dataset.

|                       | consistent | conflicting         | IS     |
|-----------------------|------------|---------------------|--------|
| gaps of length 0      |            | 27                  |        |
| gaps filled           | 2610       | 4                   | 157    |
| length (bp)           | 751634     | 13231               | 222079 |
| gaps partially filled | 9          | -                   | 15     |
| total length (bp)     | 15001      | -                   | 34223  |
| covered by reads (bp) | 6140       | -                   | 28650  |
| gaps not filled       | 1          | 3                   | 33     |
| length (bp)           | 130        |                     | 77125  |
| total assembly length |            | 4,350,872           |        |
| covered by markers    |            | 3,143,627 (72.25 %) |        |
| covered by reads      |            | 4,165,361 (95.73 %) |        |

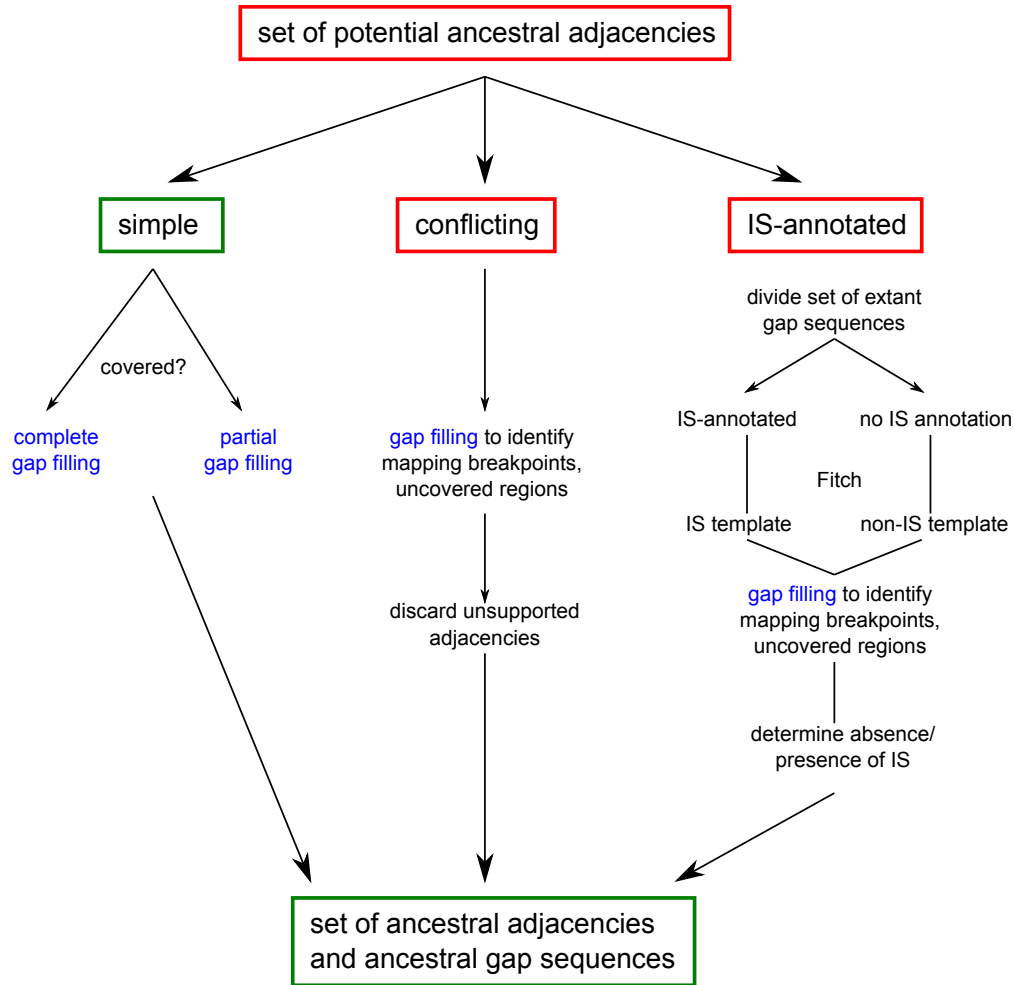

**Figure S12.** Overview over the pipeline based on the AGapEs method applied to all ancient data sets in this paper.

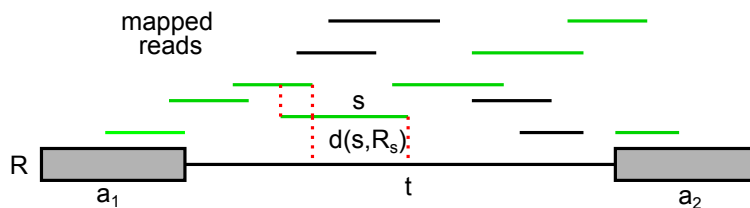

**Figure S13.** Example for a mapping of ancient reads to an adjacency and a template gap sequence. The overlapping set of reads depicted in green covers the gap template. The overlap indicated in red is represented by one edge in the graph constructed by AGapEs, the non-overlapping suffix of the mapping is considered to weight the edge by the edit distance.



615 **A.8 Comparison with gap2Seq**

616 The gap2Seq algorithm aims at closing gaps in assemblies as an exact path length problem on a de-bruijn graph of the  
 617 given reads. We ran gap2Seq on the reference-based assembly gaps with  $k = 19$ . For the de novo assembly gaps, we  
 618 could only get results for a higher  $k = 23$ , while the implementation could not finish for lower values of  $k$ .

**Table S7.** Comparison of gap filling results for AGapEs and gap2Seq on the London dataset. For each assembly, we divide all gaps into the three respective categories. We count gaps that are filled by both methods and gaps that are only filled by one of both methods. The total value sums up the number of gaps filled by each method.

|             | reference-based assembly |        |         |      | de novo assembly |        |         |      |
|-------------|--------------------------|--------|---------|------|------------------|--------|---------|------|
|             | all                      | AGapEs | gap2Seq | both | all              | AGapEs | gap2Seq | both |
| consistent  | 1991                     | 263    | 3       | 924  | 3483             | 1919   | 0       | 886  |
| conflicting | 10                       | 3      | 0       | 0    | 7                | 3      | 0       | 0    |
| IS          | 207                      | 70     | 0       | 62   | 201              | 76     | 0       | 37   |
| total       | 2208                     | 1322   | 989     |      | 3691             | 2921   | 923     |      |
|             |                          | 59,87% | 44,79%  |      |                  | 79,14% | 25,01%  |      |

619 **A.9 Conflicting components**

620 The conflicting components shown in S14 and S17 indicate potential points of genome rearrangements in the phylogeny.  
 621 Including all these adjacencies prevents from building a linear or circular gene order. We used the aDNA mapping  
 622 information to select ancestral adjacencies for linearization. Ideally, if one gap is covered by reads, we spot breakpoints  
 623 in the read mappings to the other gaps in conflict. For the London data set, the first two components in both assemblies  
 624 are matching, i. e. they coincide in the coordinates of their corresponding extant gaps. These components contain  
 625 only one adjacency that is supported by the reads each, so we remove all other adjacencies from the set of ancestral  
 626 adjacencies. For the additional third conflicting component in the reference-based assembly, no adjacency can be  
 627 supported by the reads and hence all of them are removed in order to reconstruct a set of reliable CARs. In the Marseille  
 628 data set, the conflicting components correspond to the conflicts observed in the de novo assembly for the black death  
 629 data set. However, in the first connected component, a different adjacency is supported by the reads than in the black  
 630 death data. This indicates a potential rearrangement breakpoint, however further fragmentation in the set of CARs is  
 631 preventing an explicit demonstration for that. In the second component, all adjacencies are supported by the reads.  
 632 Hence, we remove all unsupported adjacencies in the first and all adjacencies in the second component. See Figure S15  
 633 for the read coverage of discarded adjacencies.

634 For the reference-based assembly, the set of ancestral adjacencies can then be ordered into seven Contiguous  
 635 Ancestral Regions (CARs), while we obtain five CARs for the de novo assembly. We convert the reconstructed  
 636 sequences of markers back to genome sequences by filling the gaps with the read sequences if possible and resorting to  
 637 the template sequence otherwise.

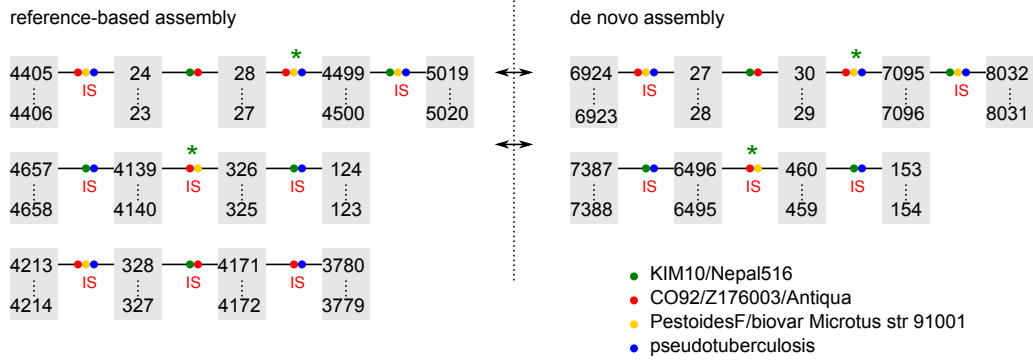

**Figure S14.** Conflicting components in the set of potential adjacencies for the reference-based assembly and the de novo assembly on the black death data set. Marker with both their extremities are indicated by the grey boxes, while adjacencies are depicted by connecting lines between two extremities. Gaps containing IS sequences are labeled accordingly. The color labels indicate the extant occurrences for each adjacency and hence its conservation in the tree. All gaps that are fully covered by reads and do not contain breakpoints in the mappings are marked by the green stars.

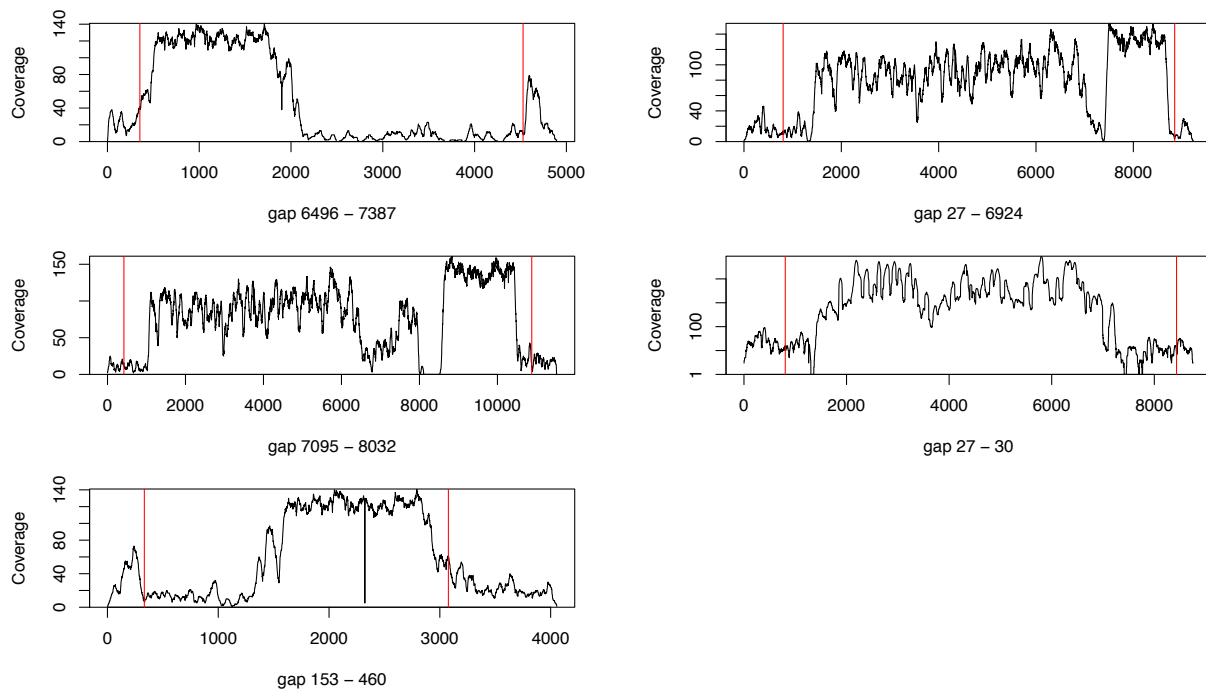

**Figure S15.** Read coverage for discarded adjacencies in conflicting components for the de novo reconstruction for the London data set. The sequence is flanked by the marker, the gap borders are indicated in red.

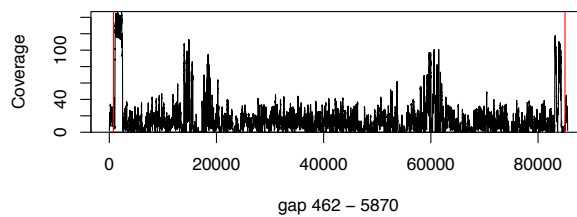

**Figure S16.** Larger gap between marker for the reconstruction of the London strain that has been removed from the assembly due to insufficient read coverage.

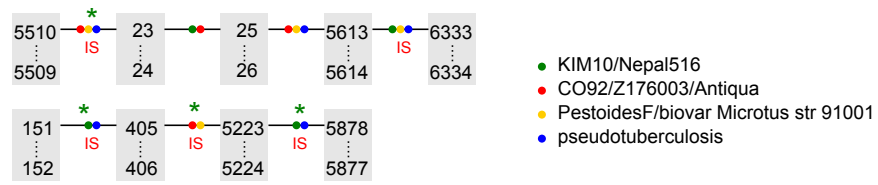

**Figure S17.** Conflicting components in the set of potential adjacencies for the marseille dataset. Marker with both their extremities are indicated by the grey boxes, while adjacencies are depicted by connecting lines between two extremities. Gaps containing IS sequences are labeled accordingly. The color labels indicate the extant occurrences for each adjacency and hence its conservation in the tree. All gaps that are fully covered by reads and do not contain breakpoints in the mappings are marked by the green stars.

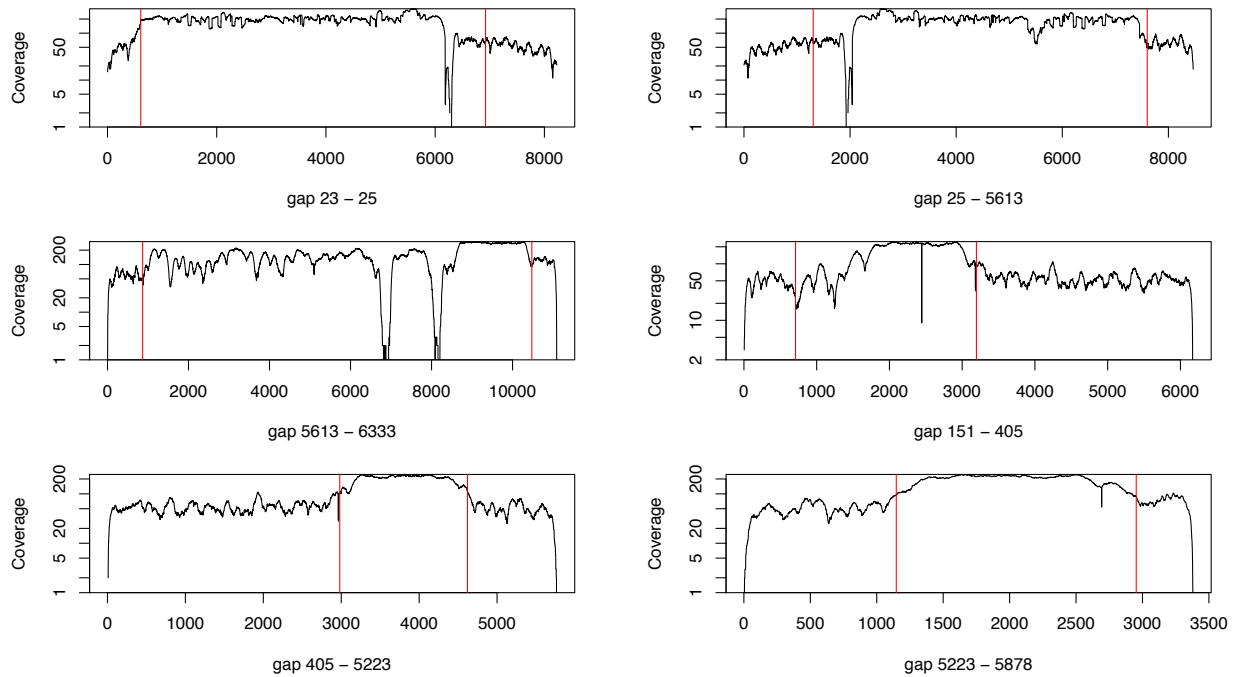

**Figure S18.** Read coverage for discarded adjacencies in conflicting components for the de novo reconstruction for the Marseille data set. The sequence is flanked by the marker, the gap borders are indicated in red.

638 **A.10 Comparison of improved assemblies for London dataset**

639 We compared the two sets of CARs obtained from both initial assemblies by aligning the resulting genome sequences  
640 using MUMmer<sup>7</sup>. As seen in Figure S19, we observe no rearrangements between both resulting sets of CARs, showing  
641 that, in terms of large-scale genome organization, the final result does not depend on the initial contig assembly.

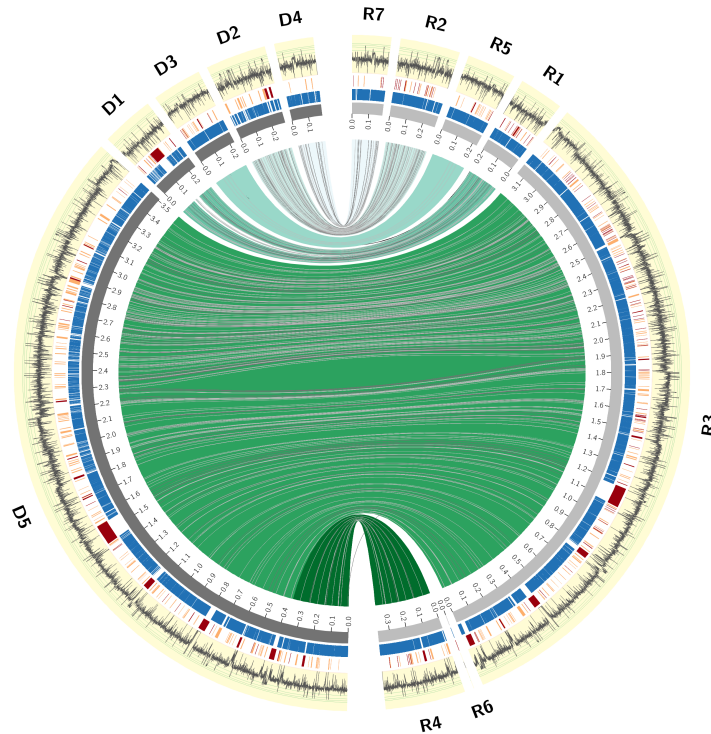

**Figure S19.** Comparison between the de novo assembly (left) and the reference-based assembly (right) for the London data set. The inner links connect corresponding CARs in the reconstructions. The grey lines indicate substitutions and InDels observed. The positions in both assemblies covered by markers are indicated in blue. All gaps that have IS annotation in the extant genomes are shown in orange. In addition, gaps that are only partially filled or have very unconserved extant gap lengths are indicated in red. Finally, the most outer ring shows the average read coverage in windows of length 200bp in log-scale. Figure done with Circos<sup>6</sup>.

642 In total, only 85,578bp in the reference-based assembly and 88,529bp in the de novo assembly are not covered by  
643 any read; however most uncovered regions are rather short (see

644 We achieve a high similarity between both sets of CARs. While the improved de novo assembly contains a larger  
645 amount of filled gap sequences, we align nearly all of both sequences and observe only a low number of SNPs and  
646 insertions and deletions between both assemblies (see Figure S19). The observed differences are often located in gaps  
647 with low read coverage regions. If short regions in the gaps are only covered by a single read, in order to find a shortest  
648 path in the mappings, this read has to be included at all costs and can cause corrections to the template that are not  
649 supported by any other read. Further re-sequencing of these regions could clear which variant is present in the ancient  
650 genome.

651 In the improved reference-based assembly, 78.74% of the resulting sequence is defined by markers and hence  
652 directly adopted from the initial assembly, while for the improved de novo assembly only 49.88% of the improved  
653 assembly is based on marker sequences and a larger part is based on the filled gap sequences. Together with the gaps  
654 that have been filled by read sequences, we can say that for the reference-based assembly in total 94.46% and for the de

**Table S8.** Comparison of improved assemblies on nucleotide level. Both sets of CARs have been corrected with PILON<sup>12</sup>, but only corrections of small InDels are kept.

|                   | reference-based | de novo assembly |
|-------------------|-----------------|------------------|
| Aligned sequences | 6 (85.71%)      | 5 (100%)         |
| Total bases       | 4398441         | 4441094          |
| Unaligned bases   | 13145(0.30%)    | 38702(0.87%)     |
| InDels            |                 | 216              |
| Substitutions     |                 | 389              |

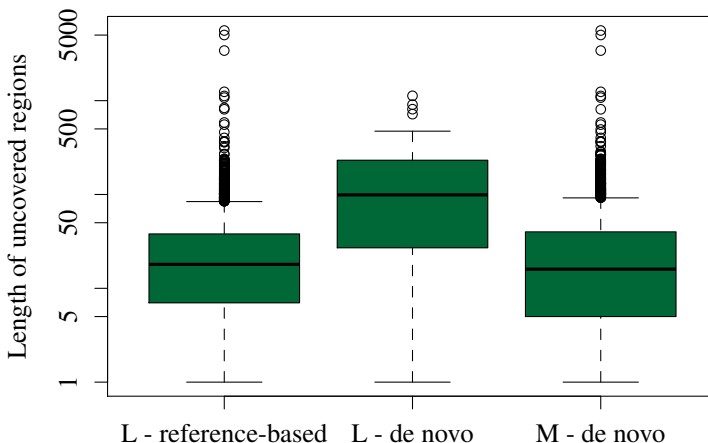

**Figure S20.** Length distribution of uncovered parts after mapping all reads from both datasets back to the improved reconstructed sequence.

655 novo assembly in total 95.25% are reconstructed using only the available aDNA reads.

656 We used *BWA*<sup>8</sup> to align all reads again to the assembly to assess the amount of uncovered regions in the reconstructed  
657 sequences. We keep all optimal mappings for each read. In total, 85578bp in the reference-based assembly and 88529bp  
658 in the de novo assembly are not covered by any read. In addition, Figure S20 shows that most uncovered regions are  
659 short.

### 660 A.11 DCJ distance

661 The DCJ distance of two genomes  $A$  and  $B$  represented as sequences of markers is the number of double cut or join  
662 operations on adjacencies in  $A$  and  $B$ . It can be computed based on the adjacency graph  $AG(A, B)$ , whose vertices  
663 display adjacencies and telomeres (marker extremities not contained in any adjacency) of  $A$  and  $B$ , and there is an edge  
664 between vertices that share the same marker extremity. Then the DCJ distance is

$$d_{DCJ}(A, B) = N - (C + I/2) \quad (1)$$

665 with  $N$  being the number of markers,  $C$  being the number of cycles and  $I$  being the number of odd paths in  $AG(A, B)$ <sup>1</sup>.

**Table S9.** Software parameters for assembly tools

| Software | parameters                                                                                          |
|----------|-----------------------------------------------------------------------------------------------------|
| SPAdes   | Multi-cell mode, single reads, read error correction, k automatically selected based on read length |
| Minia    | -abundance-min 3, -kmer-size 21 for Marseille, -kmer-size 19 for London dataset                     |
| Ragout   | -s sibelia for synteny block decomposition                                                          |
| Medusa   | -d to estimate contig distances                                                                     |
| Gap2Seq  | -k 21                                                                                               |

667 The following table is an extension of Table 1 and describes the assembly statistics for all combinations of SPAdes,  
668 minia, ragout and MeDuSa as well as the reference-based assembly with AGapEs described in the appendix.

**Table S10.** Extended Assembly statistics for both data sets, based on contigs with a minimal length of 500 bp. The LAP and CGAL likelihoods have been computed based on all reads mapping to any of the reference sequences.

|           | Assembly      | # contigs | total length | # N's     | N50       | LAP <sup>5</sup> | CGAL <sup>9</sup> |
|-----------|---------------|-----------|--------------|-----------|-----------|------------------|-------------------|
| London    | SPAdes        | 2,555     | 3,792,691 bp | 0         | 1,888     | -11.01048        | -6.90196e+08      |
|           | Minia         | 4,183     | 2,631,422 bp | 0         | 930       | -15.69016        | -7.98656e+08      |
|           | SPAdes-Ragout | 1         | 4,068,385 bp | 776,139   | -         | -12.52232        | -4.8192e+08       |
|           | Minia-Ragout  | 2         | 4,504,786 bp | 2020160   | 4,487,995 | -15.72228        | -7.86108e+08      |
|           | SPAdes-MeDuSa | 77        | 4,333,801 bp | 1,917     | 700,415   | -7.97066         | -5.00106e+08      |
|           | Minia-MeDuSa  | 9         | 2,626,626 bp | 2074      | 2,574,520 | -15.67916        | -7.7175e+08       |
|           | ref-AGapEs    | 6         | 4,398,314 bp | 0         | 3,147,154 | -7.29586         | -3.67341e+08      |
|           | Minia-AGapEs  | 5         | 4,441,104 bp | 0         | 3,511,710 | -7.26576         | -3.55155e+08      |
| Marseille | SPAdes        | 3,201     | 6,072,375 bp | 0         | 4,592     | -11.03336        | -6.0411e+08       |
|           | Minia         | 3089      | 3,636,663 bp | 0         | 1,368     | -15.05058        | -8.71446e+08      |
|           | SPAdes-Ragout | 2         | 4,564,323 bp | 542,013   | 4,530,296 | -13.34526        | -5.84186e+08      |
|           | Minia-Ragout  | 1         | 3,886,827 bp | 1,965,259 | -         | -16.41699        | -9.69013e+08      |
|           | SPAdes-MeDuSa | 2155      | 6,052,372 bp | 618       | 1,643,585 | -10.88342        | -6.12532e+08      |
|           | Minia-MeDuSa  | 125       | 3,638,125 bp | 1462      | 2,695,392 | -15.03495        | -8.42249e+08      |
|           | Minia-AGapEs  | 6         | 4,350,872 bp | 0         | 3,459,919 | -8.05526         | -4.32647e+08      |

**Table S11.** Gene predictions for London strain and *Yersinia pestis* CO92 computed with prokka<sup>11</sup>.

|               | Minia<br>+AGapEs | SPAdes<br>+Ragout<br>+Gap2Seq | Bos  | Minia | CO92 |
|---------------|------------------|-------------------------------|------|-------|------|
| CDS           | 3943             | 4027                          | 3376 | 2023  | 4090 |
| rRNA          | 16               | 0                             | 1    | 0     | 19   |
| tRNA          | 71               | 18                            | 30   | 0     | 69   |
| tmRNA         | 1                | 1                             | 0    | 0     | 1    |
| repeat_region | 3                | 1                             | 0    | 0     | 3    |

**Table S12.** Gene predictions for Marseille strain and *Yersinia pestis* CO92 computed with prokka<sup>11</sup>.

|               | Minia<br>+AGapEs | SPAdes<br>+Ragout<br>+Gap2Seq | Minia | CO92 |
|---------------|------------------|-------------------------------|-------|------|
| CDS           | 3876             | 3924                          | 2997  | 4090 |
| rRNA          | 15               | 0                             | 0     | 19   |
| tRNA          | 68               | 51                            | 4     | 69   |
| tmRNA         | 1                | 1                             | 0     | 1    |
| repeat_region | 3                | 1                             | 0     | 3    |

## References

- 669 **1.** Anne Bergeron, Julia Mixtacki, and Jens Stoye. A unifying view of genome rearrangements. In *International*  
670 *Workshop on Algorithms in Bioinformatics*, pages 163–173. Springer, 2006.
- 672 **2.** Kirsten I Bos, Alexander Herbig, Jason Sahl, Nicholas Waglechner, Mathieu Fourment, Stephen A Forrest, et al.  
673 Eighteenth century yersinia pestis genomes reveal the long-term persistence of an historical plague focus. *eLife*,  
674 page e12994, 2016.
- 675 **3.** Kirsten I. Bos, Verena J. Schuenemann, G. Brian Golding, Hernán A. Burbano, Nicholas Waglechner, Brian K.  
676 Coombes, et al. A draft genome of *Yersinia pestis* from victims of the Black Death. *Nature*, 478:506–510, 2011.
- 677 **4.** Rayan Chikhi and Guillaume Rizk. Space-efficient and exact de Bruijn graph representation based on a Bloom  
678 filter. *Algorithms for Molecular Biology*, 8:1, 2013.
- 679 **5.** Mohammadreza Ghodsi, Christopher M Hill, Irina Astrovskaya, Henry Lin, Dan D Sommer, Sergey Koren, and  
680 Mihai Pop. De novo likelihood-based measures for comparing genome assemblies. *BMC research notes*, 6(1):334,  
681 2013.
- 682 **6.** Martin I Krzywinski, Jacqueline E Schein, Inanc Birol, Joseph Connors, Randy Gascoyne, Doug Horsman, Steven J  
683 Jones, and Marco A Marra. Circos: An information aesthetic for comparative genomics. *Genome Research*, 2009.
- 684 **7.** Stefan Kurtz, Adam Phillippy, Arthur L Delcher, Michael Smoot, Martin Shumway, Corina Antonescu, and  
685 Steven L Salzberg. Versatile and open software for comparing large genomes. *Genome Biology*, 5:R12, 2004.
- 686 **8.** Heng Li and Richard Durbin. Fast and accurate short read alignment with Burrows–Wheeler transform. *Bioinform-*  
687 *atics*, 25:1754–1760, 2009.
- 688 **9.** Atif Rahman and Lior Pachter. CGAL: computing genome assembly likelihoods. *Genome biology*, 14(1):R8, 2013.
- 689 **10.** Ashok Rajaraman, Eric Tannier, and Cedric Chauve. FPSAC: fast phylogenetic scaffolding of ancient contigs.  
690 *Bioinformatics*, 29:2987–2994, 2013.
- 691 **11.** Torsten Seemann. Prokka: rapid prokaryotic genome annotation. *Bioinformatics*, page btu153, 2014.
- 692 **12.** Bruce J Walker, Thomas Abeel, Terrance Shea, Margaret Priest, Amr Abouelliel, Sharadha Sakthikumar, et al.  
693 Pilon: an integrated tool for comprehensive microbial variant detection and genome assembly improvement. *PLoS*  
694 *One*, 9(11):e112963, 2014.
- 695 **13.** Derrick E Wood and Steven L Salzberg. Kraken: ultrafast metagenomic sequence classification using exact  
696 alignments. *Genome biology*, 15(3):R46, 2014.
- 697 **14.** Daniel R Zerbino and Ewan Birney. Velvet: algorithms for de novo short read assembly using de bruijn graphs.  
698 *Genome research*, 18(5):821–829, 2008.
